# Supplementary material for: Clinical consequences of off-label reduced dosing of non-vitamin K antagonist oral anticoagulants in patients with atrial fibrillation: a systematic review and meta-analysis
Source: HighWire-hosted journal article supplement (doi:10.1136/openhrt-2022-002197), 2023-05-01
Supplement: openhrt-2022-002197supp001_data_supplement.pdf [file openhrt-2022-002197supp001_data_supplement.pdf]

## SUPPLEMENT

### Table of contents

1. Search syntax
2. Risk of bias assessment items based on the Newcastle-Ottawa quality assessment Scale for cohort studies (NOS)
3. Extracted study and patient characteristics
4. Overview of the excluded studies based on full-text screening, including reason for exclusion
5. Detailed overview of all extracted study and patient characteristics
6. Results of risk of bias assessment
7. Results of defining the most homogeneous and best quality studies for meta-analyses
8. Supplemental references

**Supplement 1: Search syntax**

Search from January 1<sup>st</sup> 2009 until July 10<sup>th</sup> 2022, PubMed:

(dose\*[Title/Abstract] OR dosa\*[Title/Abstract] OR dosi\*[Title/Abstract]) AND

(low[Title/Abstract] OR lower\*[Title/Abstract] OR adjust\*[Title/Abstract] OR adapt\*[Title/Abstract] OR alter\*[Title/Abstract] OR modif\*[Title/Abstract] OR regulat\*[Title/Abstract] OR tailor\*[Title/Abstract] OR reduc\*[Title/Abstract] OR underdos\*[Title/Abstract] OR \*recommend\*[Title/Abstract] OR inappropria\*[Title/Abstract] OR appropria\*[Title/Abstract] OR incorrect\*[Title/Abstract] OR correct\*[Title/Abstract] OR incongrue\*[Title/Abstract] OR congrue\*[Title/Abstract] OR discord\*[Title/Abstract] OR concord\*[Title/Abstract] OR offlabel[Title/Abstract] OR off-label[Title/Abstract] OR (off[Title/Abstract] AND label[Title/Abstract]) OR “Off-Label Use”[Mesh]) AND

(dabigatran[Title/Abstract] OR “dabigatran”[Mesh] OR pradaxa[Title/Abstract] OR rivaroxaban[Title/Abstract] OR “rivaroxaban”[Mesh] OR xarelto[Title/Abstract] OR apixaban[Title/Abstract] OR eliquis[Title/Abstract] OR edoxaban[Title/Abstract] OR lixiana[Title/Abstract] OR NOAC\*[Title/Abstract] OR DOAC\*[Title/Abstract] OR ((anticoagul\*[Title/Abstract] OR anti-coagul\*[Title/Abstract] OR “Anticoagulants”[Mesh]) AND (novel[Title/Abstract] OR new[Title/Abstract] OR direct[Title/Abstract])) OR (non[Title/Abstract] AND ((\*vitamin\*[Title/Abstract] AND \*antagonist\*[Title/Abstract]) OR VKA[Title/Abstract])))

Search from January 1<sup>st</sup> 2009 until July 10<sup>th</sup> 2022, EMBASE:

(dose\*:ti,ab OR dosa\*:ti,ab OR dosi\*:ti,ab) AND

(low:ti,ab OR lower\*:ti,ab OR adjust\*:ti,ab OR adapt\*:ti,ab OR alter\*:ti,ab OR modif\*:ti,ab  
OR regulat\*:ti,ab OR tailor\*:ti,ab OR reduc\*:ti,ab OR underdos\*:ti,ab OR recommend\*:ti,ab  
OR non-recommend\*ti,ab OR nonrecommend\*ti:ab OR inappropria\*:ti,ab OR  
appropria\*:ti,ab OR incorrect\*:ti,ab OR correct\*:ti,ab OR incongrue\*:ti,ab OR congrue\*:ti,ab  
OR discord\*:ti,ab OR concord\*:ti,ab OR offlabel:ti,ab OR 'off-label':ti,ab OR 'off label':ti,ab  
OR 'off label drug use'/exp) AND

(dabigatran:ti,ab OR 'dabigatran'/exp OR 'dabigatran etexilate'/exp OR pradaxa:ti,ab OR  
rivaroxaban:ti,ab OR 'rivaroxaban'/exp OR xarelto:ti,ab OR apixaban:ti,ab OR 'apixaban'/exp  
OR eliquis:ti,ab OR edoxaban:ti,ab OR 'edoxaban'/exp OR lixiana:ti,ab OR noac\*:ti,ab OR  
DOAC\*:ti,ab OR

((anticoagul\*:ti,ab OR 'anti-coagul\*':ti,ab OR 'anticoagulant agent'/exp) AND (novel:ti,ab OR  
new:ti,ab OR direct:ti,ab) OR (non\*:ti,ab AND ((vitamin\*:ti,ab AND antagonist\*:ti,ab) OR  
(VKA\*:ti,ab)))) AND

'article'/it AND [embase]/lim AND [1-1-2009]/sd NOT [10-07-2022]/sd

## **Supplement 2: Risk of bias assessment items based on the Newcastle-Ottawa quality assessment Scale for cohort studies (NOS)**

Note: A study can be awarded a maximum of one star (i.e. \*) for each numbered item within the Selection, Outcome and Missing data categories. A maximum of two stars can be given for Comparability.

### **Selection**

#### 1) Representativeness of the exposed cohort

- a. truly representative of the average AF patient without a mechanical heart valve and/or severe mitral valve stenosis who is treated with a NOAC for stroke prevention in the community \*
- b. somewhat representative of the average AF patient without a mechanical heart valve and/or severe mitral valve stenosis who is treated with a NOAC for stroke prevention in the community \*
- c. selected group of users eg nurses, volunteers
- d. no description of the derivation of the cohort

#### 2) Selection of the non exposed cohort

- a. drawn from the same community as the exposed cohort \*
- b. drawn from a different source
- c. no description of the derivation of the non exposed cohort

#### 3) Ascertainment of exposure

- a. secure record (eg surgical records) \*
- b. structured interview \*
- c. written self report
- d. no description

- 4) Demonstration that outcome of interest was not present at start of study
  - a. yes \*
  - b. no

### **Comparability**

- 1) Comparability of cohorts on the basis of the design or analysis
  - a. study controls for sex and age \*
  - b. study controls for any additional factor \*

### **Outcome**

- 1) Assessment of outcome
  - a. independent blind assessment \*
  - b. record linkage \*
  - c. self report
  - d. no description
- 2) Was follow-up long enough for outcomes to occur
  - a. yes (i.e. >90 days) \*
  - b. no
  - c. no follow-up period was reported
- 3) Adequacy of follow-up of cohorts
  - a. complete follow up – all subjects accounted for \*
  - b. subjects lost to follow up unlikely to introduce bias – small number lost -  
>90% follow up, or description provided of those lost \*
  - c. follow up rate <90% and no description of those lost
  - d. no statement

**Missing data**

- 1) Handling missing data
  - a. multiple imputation \*
  - b. no multiple imputation
  - c. not reported

**Supplement 3: Extracted study and patient characteristics**

|                                |                                                                                                                                                                          |
|--------------------------------|--------------------------------------------------------------------------------------------------------------------------------------------------------------------------|
| <b>Study characteristics</b>   | Data source (i.e. electronic health record, prospective registry)                                                                                                        |
|                                | Country                                                                                                                                                                  |
|                                | Setting (i.e. general care, specialist care, both)                                                                                                                       |
|                                | Time frame (i.e. inclusion period)                                                                                                                                       |
|                                | NOAC (i.e. dabigatran, rivaroxaban, apixaban, edoxaban)                                                                                                                  |
|                                | Guideline used to determine whether a non-reduced or a reduced NOAC dose was indicated (i.e. SPC, FDA, ESC, EHRA, landmark NOAC trial(s), other guideline, not reported) |
|                                | Number of included patients with AF who use a NOAC                                                                                                                       |
|                                | Duration of follow-up in months                                                                                                                                          |
| <b>Patient characteristics</b> | Male sex in percentage                                                                                                                                                   |
|                                | Age in years in mean (or median)                                                                                                                                         |
|                                | Weight in kilograms in mean (or median)                                                                                                                                  |
|                                | Body mass index in mean (or median)                                                                                                                                      |
|                                | eGFR (or CrCl) in mean (or median)                                                                                                                                       |
|                                | Patients with an eGFR below 50 in percentage                                                                                                                             |
|                                | Patients with hypertension in percentage                                                                                                                                 |
|                                | Patients with a history of (ischemic) stroke (and TIA and/or thromboembolism) in percentage (including definition)                                                       |
|                                | Patients with a history of hemorrhagic stroke in percentage                                                                                                              |
|                                | Patients with (a history of) coronary heart disease in percentage (including definition)                                                                                 |
|                                | Patients with (a history of) (peripheral) vascular disease in percentage                                                                                                 |
|                                | Patients with heart failure in percentage                                                                                                                                |
|                                | Patients with (a history of) other cardiovascular disease in percentage (including definition)                                                                           |
|                                | Patients with diabetes mellitus in percentage                                                                                                                            |
|                                | Patients with chronic kidney disease in percentage (including definition)                                                                                                |
|                                | Patients using concomitant drugs that interact with NOACs in percentage (including the type of drug)                                                                     |

AF = atrial fibrillation; CrCl = creatinine clearance; eGFR = estimated Glomerular Filtration Rate; EHRA = European Heart Rhythm Association; ESC = European Society of Cardiology; FDA = Food and Drugs Administration; NOAC = non-vitamin K antagonist oral anticoagulant; SPC = Summary of Product Characteristics; VKA = vitamin K antagonist.

**Supplement 4: Overview of the excluded studies based on full-text screening, including reason for exclusion\***

| Author      | Year | Reference | Reason for exclusion                                                                                            |
|-------------|------|-----------|-----------------------------------------------------------------------------------------------------------------|
| Lafon       | 2018 | (1)       | No full-text available                                                                                          |
| Aguilar     | 2021 | (2)       | Highly selected group of patients or data on patients with non-valvular atrial fibrillation cannot be extracted |
| Alcusky     | 2018 | (3)       |                                                                                                                 |
| Alghadeer   | 2017 | (4)       |                                                                                                                 |
| Alnsasra    | 2018 | (5)       |                                                                                                                 |
| Altay       | 2017 | (6)       |                                                                                                                 |
| Asahina     | 2020 | (7)       |                                                                                                                 |
| Chaudhry    | 2021 | (8)       |                                                                                                                 |
| de Almeida  | 2020 | (9)       |                                                                                                                 |
| Eschler     | 2021 | (10)      |                                                                                                                 |
| Frol        | 2020 | (11)      |                                                                                                                 |
| George      | 2019 | (12)      |                                                                                                                 |
| Gurevitz    | 2021 | (13)      |                                                                                                                 |
| Haque       | 2021 | (14)      |                                                                                                                 |
| Inohara     | 2020 | (15)      |                                                                                                                 |
| Jackevicius | 2021 | (16)      |                                                                                                                 |
| Khan        | 2016 | (17)      |                                                                                                                 |
| Kim         | 2019 | (18)      |                                                                                                                 |
| Kwon        | 2016 | (19)      |                                                                                                                 |
| Lafon       | 2017 | (20)      |                                                                                                                 |
| Mitrovic    | 2017 | (21)      |                                                                                                                 |
| Nahornyj    | 2020 | (22)      |                                                                                                                 |
| Paciaroni   | 2019 | (23)      |                                                                                                                 |
| Rutherford  | 2021 | (24)      |                                                                                                                 |
| Shinoda     | 2018 | (25)      |                                                                                                                 |
| Shinohara   | 2019 | (26)      |                                                                                                                 |
| Shinohara   | 2019 | (27)      |                                                                                                                 |
| Szeto       | 2021 | (28)      |                                                                                                                 |

|             |      |      |                                                                                         |
|-------------|------|------|-----------------------------------------------------------------------------------------|
| Ting        | 2020 | (29) | Study does not report off-label reduced dosing compared to on-label non-reduced dosing. |
| Tran        | 2017 | (30) |                                                                                         |
| Whitworth   | 2017 | (31) |                                                                                         |
| Akagi       | 2019 | (32) |                                                                                         |
| Akao        | 2014 | (33) |                                                                                         |
| Amarenco    | 2018 | (34) |                                                                                         |
| Anouassi    | 2021 | (35) |                                                                                         |
| Armbruster  | 2014 | (36) |                                                                                         |
| Ashraf      | 2021 | (37) |                                                                                         |
| Blin        | 2019 | (38) |                                                                                         |
| Bouget      | 2020 | (39) |                                                                                         |
| Camm        | 2020 | (40) |                                                                                         |
| Chan        | 2020 | (41) |                                                                                         |
| Chen        | 2021 | (42) |                                                                                         |
| Cheng       | 2019 | (43) |                                                                                         |
| Cho         | 2019 | (44) |                                                                                         |
| De Caterina | 2021 | (45) |                                                                                         |
| Ebrahimi    | 2017 | (46) |                                                                                         |
| Feng        | 2021 | (47) |                                                                                         |
| Fernandez   | 2021 | (48) |                                                                                         |
| Forslund    | 2018 | (49) |                                                                                         |
| Gabitova    | 2019 | (50) |                                                                                         |
| Godino      | 2020 | (51) |                                                                                         |
| Hecker      | 2016 | (52) |                                                                                         |
| Helmert     | 2017 | (53) |                                                                                         |
| Hussain     | 2012 | (54) |                                                                                         |
| Inoue       | 2019 | (55) |                                                                                         |
| Isaacs      | 2013 | (56) |                                                                                         |
| Isaacs      | 2016 | (57) |                                                                                         |
| Jang        | 2019 | (58) |                                                                                         |
| Jansson     | 2019 | (59) |                                                                                         |
| Kohsaka     | 2020 | (60) |                                                                                         |

|                  |      |      |  |
|------------------|------|------|--|
| Kotalczyk        | 2021 | (61) |  |
| Larsen           | 2013 | (62) |  |
| Lee              | 2015 | (63) |  |
| Li               | 2017 | (64) |  |
| Marzona          | 2021 | (65) |  |
| Muniz Lobato     | 2018 | (66) |  |
| Navarro-Almenzar | 2019 | (67) |  |
| Nielsen          | 2017 | (68) |  |
| Ogawa            | 2014 | (69) |  |
| Perreault        | 2020 | (70) |  |
| Qian             | 2021 | (71) |  |
| Racciah          | 2021 | (72) |  |
| Rahme            | 2021 | (73) |  |
| Ruiz-Ortiz       | 2020 | (74) |  |
| Russo            | 2015 | (75) |  |
| Sato             | 2018 | (76) |  |
| Shrestha         | 2018 | (77) |  |
| Staerk           | 2018 | (78) |  |
| Sugrue           | 2021 | (79) |  |
| Wattananuengchai | 2020 | (80) |  |
| Yu               | 2020 | (81) |  |
| Bando            | 2018 | (82) |  |
| Bang             | 2020 | (83) |  |
| Barra            | 2016 | (84) |  |
| Bastida          | 2017 | (85) |  |
| Brook            | 2020 | (86) |  |
| Chao             | 2021 | (87) |  |
| Eschler          | 2020 | (88) |  |
| Gustafson        | 2019 | (89) |  |
| Ionin            | 2021 | (90) |  |
| Kartas           | 2019 | (91) |  |
| Kilickiran Avci  | 2016 | (92) |  |

|           |      |       |                                                                                    |
|-----------|------|-------|------------------------------------------------------------------------------------|
| Kimmons   | 2014 | (93)  | Study does not report association between off-label reduced dosing and outcome(s). |
| Larock    | 2014 | (94)  |                                                                                    |
| Lee       | 2020 | (95)  |                                                                                    |
| Lodzinski | 2020 | (96)  |                                                                                    |
| Masunaga  | 2018 | (97)  |                                                                                    |
| Miyazaki  | 2022 | (98)  |                                                                                    |
| Pisters   | 2017 | (99)  |                                                                                    |
| Sato      | 2018 | (100) |                                                                                    |
| Sato      | 2020 | (101) |                                                                                    |
| Suwa      | 2019 | (102) |                                                                                    |
| Tedders   | 2013 | (103) |                                                                                    |
| Tellor    | 2015 | (104) |                                                                                    |
| Tran      | 2014 | (105) |                                                                                    |
| Umei      | 2017 | (106) |                                                                                    |
| Vinding   | 2019 | (107) |                                                                                    |
| Xing      | 2019 | (108) |                                                                                    |
| Yiginer   | 2017 | (109) |                                                                                    |
| Zeymer    | 2020 | (110) | Other                                                                              |
| Abe       | 2021 | (111) |                                                                                    |
| Steinberg | 2016 | (112) |                                                                                    |
| Ueda      | 2020 | (113) |                                                                                    |

\* In case there were several reasons to exclude a study, the reason mentioned first in the table above is reported.

Supplement 5: Detailed overview of all extracted study and patient characteristics

| Last date of inclusion | First date of inclusion | Setting (i.e. general care, specialist care, both) | Country                     | Data source | Year | Study characteristics | Author*                                   |
|------------------------|-------------------------|----------------------------------------------------|-----------------------------|-------------|------|-----------------------|-------------------------------------------|
| 31-12-2017             | 01-01-2011              | Both                                               | Israel                      | EHR         | 2019 |                       | Arbel (114)                               |
| 30-06-2016             | 01-11-2012              | Both                                               | Japan                       | PR          | 2021 |                       | Atarashi (115)                            |
| 31-12-2016             | 01-10-2010              | Both                                               | USA                         | EHR         | 2020 |                       | Briasoulis – dabigatran/rivaroxaban (116) |
| 31-12-2016             | 01-10-2010              | Both                                               | USA                         | EHR         | 2020 |                       | Briasoulis – dabigatran (116)             |
| 31-12-2016             | 01-10-2010              | Both                                               | USA                         | EHR         | 2020 |                       | Briasoulis – rivaroxaban (116)            |
| 31-12-2016             | 01-07-2015              | SC                                                 | Korea                       | EHR         | 2020 |                       | Cho – rivaroxaban/apixaban (117)          |
| 31-12-2016             | 01-07-2015              | SC                                                 | Korea                       | EHR         | 2020 |                       | Cho – rivaroxaban (117)                   |
| 31-12-2016             | 01-07-2015              | SC                                                 | Korea                       | EHR         | 2020 |                       | Cho – apixaban (117)                      |
| n.r.                   | 01-08-2015              | Both                                               | Multi-national <sup>1</sup> | PR          | 2020 |                       | de Groot (118)                            |
| 30-06-2014             | 01-04-2012              | Both                                               | Japan                       | PR          | 2019 |                       | Ikeda (119)                               |
| 30-11-2013             | 12-12-2011              | Both                                               | Japan                       | PR          | 2019 |                       | Inoue – 2019 (120)                        |
| 31-08-2014             | 01-09-2013              | Both                                               | Japan                       | PR          | 2020 |                       | Inoue – 2020 (121)                        |
| 30-11-2017             | 01-06-2011              | SC                                                 | Japan                       | PR          | 2020 |                       | Kobayashi (122)                           |
| 31-12-2013             | 01-01-2012              | SC                                                 | Korea                       | EHR         | 2017 |                       | Lee – 2017 (123)                          |
| 31-12-2016             | 01-01-2014              | Both                                               | Korea                       | EHR         | 2019 |                       | Lee – 2019 (124)                          |
| 31-12-2017             | 01-01-2015              | Both                                               | Korea                       | EHR         | 2021 |                       | Lee – 2021 (125)                          |
| 31-12-2015             | 01-09-2013              | Both                                               | Japan                       | PR          | 2019 |                       | Murata (126)                              |
| 30-11-2017             | 01-06-2011              | Both                                               | Japan                       | PR          | 2020 |                       | Ohno (127)                                |
| 31-12-2017             | 01-11-2013              | Both                                               | Israel                      | EHR         | 2020 |                       | Salameh (128)                             |
| 31-07-2016             | 01-02-2013              | Both                                               | USA                         | PR          | 2018 |                       | Steinberg (129)                           |
| 30-06-2016             | 01-01-2013              | SC                                                 | USA                         | EHR         | 2017 |                       | Tellor (130)                              |
| 31-07-2017             | 01-05-2012              | SC                                                 | Japan                       | PR          | 2019 |                       | Yagi (131)                                |
| 30-09-2015             | 01-10-2010              | Both                                               | USA                         | EHR         | 2017 |                       | Yao – dabigatran (132)                    |
| 30-09-2015             | 01-10-2010              | Both                                               | USA                         | EHR         | 2017 |                       | Yao – rivaroxaban (132)                   |
| 30-09-2015             | 01-10-2010              | Both                                               | USA                         | EHR         | 2017 |                       | Yao – apixaban (132)                      |

Supplemental material

Open Heart

Joosten LPT, et al. *Open Heart* 2023; 10:e002197. doi: 10.1136/openhrt-2022-002197

| eGFR <50 (%)       | eGFR (mean)         | Body mass index (mean) | Weight in kg (mean) | Age in years (mean) | Male sex (%) | Patient characteristics | Duration of follow-up (months) | NOAC-users (n)      | Guideline used                       | NOAC    |
|--------------------|---------------------|------------------------|---------------------|---------------------|--------------|-------------------------|--------------------------------|---------------------|--------------------------------------|---------|
| n.r.               | 71.5                | 30.2                   | n.r.                | 75.5                | 48.0         |                         | 23                             | 8,425               | SPC                                  | D/R/A   |
| n.r.               | n.r.                | n.r.                   | 62.7                | 71.6                | 67.7         |                         | n.r.                           | 6,806               | J-ROCKET-AF                          | R       |
| 48.8 <sup>11</sup> | n.r.                | n.r.                   | n.r.                | n.r.                | n.r.         |                         | 12.5                           | 27,747              | D: FDA<br>R: other <sup>2</sup>      | D/R     |
| 53.0 <sup>11</sup> | n.r.                | n.r.                   | n.r.                | n.r.                | 50.6         |                         | 14.8                           | 8,035               | FDA                                  | D       |
| 47.0 <sup>11</sup> | n.r.                | n.r.                   | n.r.                | n.r.                | 50.2         |                         | 11.6                           | 19,712              | Other <sup>2</sup>                   | R       |
| n.r.               | 69.6 <sup>o</sup>   | 25.3                   | n.r.                | 70.3                | 54.4         |                         | 15.0 <sup>‡</sup>              | 16,568              | R: ROCKET-AF<br>A: ARISTOTLE         | R/A     |
| n.r.               | 72.7 <sup>o</sup>   | 25.5                   | n.r.                | 69.8                | 59.4         |                         | 15.0 <sup>‡</sup>              | 9,639               | ROCKET-AF                            | R       |
| n.r.               | 65.4 <sup>o</sup>   | 25.0                   | n.r.                | 71.0                | 47.4         |                         | 15.0 <sup>‡</sup>              | 6,929               | ARISTOTLE                            | A       |
| n.r.               | 74.3 <sup>o</sup>   | 28.1                   | 81.0                | 73.6                | 56.8         |                         | 11.6 <sup>‡</sup>              | 13,092              | SPC                                  | E       |
| 0                  | 77.7 <sup>o</sup>   | 24.7                   | 64.9                | 70.4                | 68.3         |                         | ±12                            | 6,521 <sup>10</sup> | J-ROCKET-AF                          | R       |
| 18                 | 72.9 <sup>o</sup>   | 24.0                   | 62.7                | 70.9                | 66.9         |                         | 15.1 <sup>‡</sup>              | 6,443               | Other <sup>3</sup>                   | D       |
| 31.4               | 62.2 <sup>o</sup>   | n.r.                   | 59.5                | 74.5                | 58.9         |                         | 17.4                           | 6,294               | ARISTOTLE                            | A       |
| n.r.               | 80.3 <sup>o</sup>   | n.r.                   | 65.8                | 67.2                | 73.6         |                         | 13.4                           | 1,245               | ARISTOTLE + other <sup>4</sup>       | D/R/A/E |
| n.r.               | 66.1 <sup>o</sup> ‡ | n.r.                   | n.r.                | 74.0                | 62.2         |                         | ±12                            | 844                 | Other <sup>5</sup>                   | D       |
| n.r.               | 82.5 <sup>o</sup>   | 24.8                   | 64.9                | 69.8 <sup>‡</sup>   | 57.4         |                         | 16.8 <sup>‡</sup>              | 13,594              | ROCKET-AF                            | R       |
| 7.6                | 77.1                | 24.6                   | 63.6                | 72.6                | 56           |                         | 24 <sup>‡</sup>                | 8,512               | ESC                                  | A       |
| n.r.               | 70.5 <sup>o</sup>   | 24.1                   | 63.8                | 71.7                | 71.5         |                         | 39.3 <sup>‡</sup>              | 1,658               | ARISTOTLE + other <sup>6</sup>       | D/R/A/E |
| n.r.               | 65.4                | 23.7                   | 60.9                | 71.6                | 63.6         |                         | 13.4                           | 2,195               | ARISTOTLE + SPC + other <sup>7</sup> | D/R/A/E |
| n.r.               | 63.8                | n.r.                   | 78.1                | 78.7                | 48.3         |                         | 15.3                           | 27,765              | SPC                                  | A       |
| n.r.               | 81.7 <sup>o</sup> ‡ | n.r.                   | n.r.                | 71 <sup>‡</sup>     | 58.7         |                         | 12.0 <sup>‡</sup>              | 7,925               | FDA                                  | D/R/A/E |
| n.r.               | 42 <sup>o</sup>     | n.r.                   | 86.9                | 75.1                | 48.7         |                         | 16.3                           | 707                 | FDA                                  | A       |
| 15.7               | 64.1                | n.r.                   | 67.1                | 69.1                | 78           |                         | 10.8 <sup>‡</sup>              | 661                 | J-ROCKET-AF                          | R       |
| 13.6               | 71.6                | n.r.                   | n.r.                | 68.3                | 61.7         |                         | 4.0 <sup>‡</sup>               | 4,653               | Other <sup>8</sup>                   | D       |
| 0                  | 76.4                | n.r.                   | n.r.                | 69.6                | 59.9         |                         | 4.0 <sup>‡</sup>               | 5,399               | FDA                                  | R       |
| 12.6               | 71.1                | n.r.                   | n.r.                | 72.4                | 50.6         |                         | 4.0 <sup>‡</sup>               | 3,340               | Other <sup>9</sup>                   | A       |

Supplemental material

BMJ Publishing Group Limited (BMJ) disclaims all liability and responsibility arising from any reliance placed on this supplemental material which has been supplied by the author(s)

Open Heart

Joosten LPT, et al. *Open Heart* 2023; 10:e02197. doi:10.1136/openhrt-2022-002197

| Concomitant PI (%) | Chronic kidney disease (%) – definition | Diabetes mellitus (%) | (History of) other cardiovascular disease (%) – definition | Heart failure (%) | (History of) (peripheral) vascular disease (%) | (History of) coronary heart disease (%) – definition | History of hemorrhagic stroke (%) | History of (ischemic) stroke (and TIA and/or thromboembolism) (%) – definition | Hypertension (%) |
|--------------------|-----------------------------------------|-----------------------|------------------------------------------------------------|-------------------|------------------------------------------------|------------------------------------------------------|-----------------------------------|--------------------------------------------------------------------------------|------------------|
| 42.3               | 18.0 – <sup>21</sup>                    | 59.8                  | n.r.                                                       | 26.9              | 16.6                                           | n.r. – n.a.                                          | n.r.                              | 31.4 – <sup>12</sup>                                                           | 95.4             |
| 9.4                | n.r. – n.a.                             | 24.7                  | n.r.                                                       | 26.5              | n.r.                                           | 4.2 – MI                                             | 1.9                               | 20.2 – <sup>13</sup>                                                           | 71.2             |
| 26.6               | 24.9 – <sup>22</sup>                    | 48.9                  | n.r.                                                       | 29.9              | n.r.                                           | 6.5 – MI                                             | 0.9                               | 24.5 – <sup>12</sup>                                                           | 93.2             |
| 27.5               | 23.3 – <sup>22</sup>                    | 49.2                  | n.r.                                                       | 34.4              | n.r.                                           | 5.7 – MI                                             | 0.7                               | 24.8 – <sup>12</sup>                                                           | 93.9             |
| 26.2               | 25.6 – <sup>22</sup>                    | 48.8                  | n.r.                                                       | 28.0              | n.r.                                           | 6.8 – MI                                             | 1.0                               | 24.3 – <sup>12</sup>                                                           | 92.9             |
| 9.1 <sup>29</sup>  | 2.7 – <sup>23</sup>                     | 46.6                  | n.r.                                                       | 19.1              | 11.4                                           | n.r. – n.a.                                          | 1.1                               | 19.9 – <sup>14</sup>                                                           | 87.6             |
| 8.9 <sup>29</sup>  | 1.8 – <sup>23</sup>                     | 47.0                  | n.r.                                                       | 18.7              | 11.0                                           | n.r. – n.a.                                          | 0.9                               | 18.6 – <sup>14</sup>                                                           | 88.4             |
| 9.5 <sup>29</sup>  | 3.9 – <sup>23</sup>                     | 46.1                  | n.r.                                                       | 19.6              | 11.8                                           | n.r. – n.a.                                          | 1.5                               | 21.8 – <sup>14</sup>                                                           | 86.4             |
| n.r.               | n.r. – n.a.                             | 22.0                  | n.r.                                                       | 5.9               | 3.3 <sup>18</sup>                              | 4.3 – MI                                             | 0.5                               | 5.9 – <sup>13</sup>                                                            | 77.1             |
| 13.7               | 0 – <sup>24</sup>                       | 23.3                  | 3.2 – <sup>19</sup>                                        | 21.0              | n.r.                                           | n.r. – n.a.                                          | n.r.                              | 20.5 – <sup>15</sup>                                                           | 74.5             |
| 13.8               | n.r. – n.a.                             | 20.4                  | n.r.                                                       | 18.2              | n.r.                                           | n.r. – n.a.                                          | n.r.                              | 20.2 – <sup>12</sup>                                                           | 66.7             |
| 18.8               | 41.5 – <sup>25</sup>                    | 55                    | n.r.                                                       | 30.4              | n.r.                                           | n.r. – n.a.                                          | n.r.                              | 17.5 – <sup>15</sup>                                                           | 61.2             |
| 21.9 <sup>30</sup> | n.r. – n.a.                             | 28.4                  | n.r.                                                       | 17.4              | n.r.                                           | 18.5 – CAD                                           | n.r.                              | 16.9 – <sup>12</sup>                                                           | 71.2             |
| n.r.               | n.r. – n.a.                             | 22.2                  | n.r.                                                       | 9.1               | n.r.                                           | 5.8 – MI                                             | n.r.                              | 49.8 – <sup>16</sup>                                                           | 65.2             |
| n.r.               | n.r. – n.a.                             | 22.4                  | n.r.                                                       | 30.4              | 17.7 <sup>18</sup>                             | 2.8 – MI                                             | n.r.                              | n.r. – n.a.                                                                    | 72.2             |
| 34.3               | n.r. – n.a.                             | 27.8                  | n.r.                                                       | 46.1              | 26.8 <sup>18</sup>                             | 6.1 – MI                                             | n.r.                              | 29.2 – <sup>12</sup>                                                           | 85.5             |
| 12.7               | n.r. – n.a.                             | 21.6                  | n.r.                                                       | 19.1              | 11.7                                           | n.r. – n.a.                                          | n.r.                              | 10.1 – <sup>16</sup>                                                           | 69.4             |
| 21.5               | 39.2 – <sup>26</sup>                    | 26.1                  | n.r.                                                       | 32.5              | 7.2                                            | 19.9 – CAD                                           | n.r.                              | 20.3 – <sup>12</sup>                                                           | 73.3             |
| 48.9               | 2.8 – <sup>27</sup>                     | 46.4                  | n.r.                                                       | 32.6              | 12.5                                           | 31.9 – MI                                            | n.r.                              | 24.9 – <sup>12</sup>                                                           | 90.1             |
| 25.7 <sup>30</sup> | n.r. – n.a.                             | n.r.                  | n.r.                                                       | n.r.              | n.r.                                           | n.r. – n.a.                                          | n.r.                              | 11.1 – <sup>16</sup>                                                           | n.r.             |
| 53.3               | 5 – <sup>28</sup>                       | n.r.                  | n.r.                                                       | n.r.              | n.r.                                           | n.r. – n.a.                                          | n.r.                              | n.r. – n.a.                                                                    | n.r.             |
| 11.0               | n.r. – n.a.                             | 16                    | 5.0 – <sup>20</sup>                                        | 17.0              | n.r.                                           | n.r. – n.a.                                          | n.r.                              | 6.0 – <sup>15</sup>                                                            | 54               |
| 6.4                | n.r. – n.a.                             | 41.8                  | n.r.                                                       | 27.9              | 25.2                                           | n.r. – n.a.                                          | 1.0                               | 14.0 – <sup>17</sup>                                                           | 88.7             |
| 7.4                | n.r. – n.a.                             | 39.3                  | n.r.                                                       | 26.5              | 26.7                                           | n.r. – n.a.                                          | 0.8                               | 13.1 – <sup>17</sup>                                                           | 88.1             |
| 7.5                | n.r. – n.a.                             | 39.7                  | n.r.                                                       | 31.8              | 29.1                                           | n.r. – n.a.                                          | 1.6                               | 14.7 – <sup>17</sup>                                                           | 90.8             |

Supplemental material

BMJ Publishing Group Limited (BMJ) disclaims all liability and responsibility arising from any reliance placed on this supplemental material which has been supplied by the author(s).

Open Heart

Joosten ET, et al. *Open Heart* 2023; 10:e002197. doi: 10.1136/openhrt-2022-002197

| OLRD of patients with an indication for an on-label non-reduced NOAC dose (%) | On-label non-reduced dose (n) | Off-label reduced dose (n) | Off-label reduced and on-label non-reduced NOAC dose | Other concomitant drug that interacts with NOACs (%) – type of drug | Concomitant P-gp inhibitor (%) | Concomitant NSAID (%) |
|-------------------------------------------------------------------------------|-------------------------------|----------------------------|------------------------------------------------------|---------------------------------------------------------------------|--------------------------------|-----------------------|
| 39.0                                                                          | 5,140                         | 3,285                      |                                                      | n.r. – n.a.                                                         | n.r.                           | 43.3                  |
| 30.2                                                                          | 3,717                         | 1,609                      |                                                      | n.r. – n.a.                                                         | n.r.                           | n.r.                  |
| 19.2                                                                          | 14,962                        | 3,564                      |                                                      | 18.2 – warfarin                                                     | 19.6                           | 51.0                  |
| 15.3                                                                          | 5,621                         | 1,013                      |                                                      | 24.4 – warfarin                                                     | 22.5                           | 50.9                  |
| 21.5                                                                          | 9,341                         | 2,551                      |                                                      | 15.7 – warfarin                                                     | 18.4                           | 51.0                  |
| 51.6                                                                          | 8,019                         | 8,549                      |                                                      | 4.9 – ADP-2 inhibitor                                               | n.r.                           | n.r.                  |
| 50.6                                                                          | 4,760                         | 4,879                      |                                                      | 4.5 – ADP-2 inhibitor                                               | n.r.                           | n.r.                  |
| 53.0                                                                          | 3,259                         | 3,670                      |                                                      | 5.6 – ADP-2 inhibitor                                               | n.r.                           | n.r.                  |
| 11.2                                                                          | 8,872                         | 1,114                      |                                                      | n.r. – n.a.                                                         | n.r.                           | n.r.                  |
| 35.8                                                                          | 4,185                         | 2,336                      |                                                      | n.r. – n.a.                                                         | n.r.                           | n.r.                  |
| 49.7                                                                          | 1,196                         | 1,181                      |                                                      | n.r. – n.a.                                                         | 3.3                            | n.r.                  |
| 22.5                                                                          | 3,241                         | 941                        |                                                      | n.r. – n.a.                                                         | n.r.                           | n.r.                  |
| 27.1                                                                          | 907                           | 338                        |                                                      | n.r. – n.a.                                                         | n.r.                           | n.r.                  |
| 38.4                                                                          | 294                           | 183                        |                                                      | n.r. – n.a.                                                         | n.r.                           | n.r.                  |
| 42.6                                                                          | 7,798                         | 5,796                      |                                                      | n.r. – n.a.                                                         | n.r.                           | n.r.                  |
| 40.8                                                                          | 4,194                         | 2,890                      |                                                      | n.r. – n.a.                                                         | n.r.                           | n.r.                  |
| 33.1                                                                          | 746                           | 369                        |                                                      | n.r. – n.a.                                                         | n.r.                           | 2.0                   |
| 27.1                                                                          | 907                           | 338                        |                                                      | n.r. – n.a.                                                         | n.r.                           | n.r.                  |
| 42.9                                                                          | 13,141                        | 9,885                      |                                                      | n.r. – n.a.                                                         | n.r.                           | n.r.                  |
| 10.3                                                                          | 6,376                         | 734                        |                                                      | n.r. – n.a.                                                         | n.r.                           | n.r.                  |
| 17.0                                                                          | 477                           | 98                         |                                                      | n.r. – n.a.                                                         | n.r.                           | n.r.                  |
| 23.1                                                                          | 409                           | 123                        |                                                      | n.r. – n.a.                                                         | n.r.                           | n.r.                  |
| 8.9                                                                           | 4,241                         | 412                        |                                                      | n.r. – n.a.                                                         | n.r.                           | 4.8                   |
| 9.6                                                                           | 4,881                         | 518                        |                                                      | n.r. – n.a.                                                         | n.r.                           | 4.8                   |
| 16.5                                                                          | 2,790                         | 550                        |                                                      | n.r. – n.a.                                                         | n.r.                           | 5.0                   |

A = apixaban; ADP = adenosine diphosphate; AF = atrial fibrillation; b.i.d. = bis in die (= twice a day); CAD = coronary artery disease; CrCl = creatinine clearance; D = dabigatran; E = edoxaban; eGFR = estimated Glomerular Filtration Rate; EHR = electronic health record; ESC = European Society of Cardiology; FDA = Food and Drugs Administration; GI = gastrointestinal; ICD = International Classification of Diseases and Related Health Problems; i.e. = id est (= that is); kg = kilogram; MI = myocardial infarction; n.a. = not applicable; NOAC = non-vitamin K antagonist oral anticoagulant; n.r. = not reported; NSAID = non-steroidal anti-inflammatory drug; o.d. = omnie die (= once a day); OLRD = off-label reduced dosing; P-gp = P-glycoprotein; PI = platelet inhibitor; PR = prospective registry; R = rivaroxaban; SC = specialist care; SPC = Summary of Product Characteristics; TIA = transient ischemic attack; USA = United States of America; VKA = vitamin K antagonist.

<sup>1</sup> Austria, Belgium, Germany, Ireland, Italy, Portugal, Spain, Switzerland, The Netherlands, United Kingdom; <sup>2</sup> FDA or concomitant use of a dual P-gp-Cyp3A4 inhibitor (including ketoconazole, fluconazole, itraconazole, cobicistat, conivaptan, indinavir, voriconazole, posaconazole, nefzadone HCL, ritonavir, saquinavir, telithromycin); <sup>3</sup> age  $\geq 70$  years, CrCl of 30-50mL/min, prior GI-bleeding, or concomitant use of oral P-gp inhibitors; <sup>4</sup> D: elderly  $>70$  years, CrCl 30-50mL/min, concomitant use of P-gp inhibitors, history of GI-bleeding, R: CrCl 15-49mL/min, A: ARISTOTLE, E: body weight  $\leq 60$ kg, CrCl 15-50mL/min, concomitant use of P-gp inhibitors; <sup>5</sup> old age ( $\geq 75$  years old), renal dysfunction (glomerular filtration rate  $<50$ mL/min), or low body weight ( $<50$ kg); <sup>6</sup> D 110mg b.i.d.: CrCl 30-50mL/min, age  $\geq 70$  years and a prior history of bleeding, R 10mg

o.d.: CrCl 15-50mL/min, A 2.5mg b.i.d.: ARISTOTLE, E 30mg o.d.: CrCl 15-50mL/min or body weight <60kg; <sup>7</sup> D: age ≥70 years, CrCl 30-50mL/min, concomitant P-gp inhibitors, or history of GI-bleeding, R: SPC, A: ARISTOTLE, E: SPC; <sup>8</sup> eGFR<30mL/min/1.73m<sup>2</sup>; <sup>9</sup> serum creatinine level ≥1.5mg/dl; <sup>10</sup> only patients with CrCl ≥50ml/min; <sup>11</sup> eGFR <60 instead of eGFR <50; <sup>12</sup> stroke; <sup>13</sup> ischemic stroke; <sup>14</sup> stroke, TIA or thromboembolism; <sup>15</sup> ischemic stroke or TIA; <sup>16</sup> stroke or TIA; <sup>17</sup> thromboembolism (arterial); <sup>18</sup> peripheral artery disease; <sup>19</sup> MI and/or peripheral artery disease and/or aortic plaque; <sup>20</sup> MI or arteriosclerosis obliterans; <sup>21</sup> chronic renal failure; <sup>22</sup> renal disease (ICD-9 and ICD-10 codes): moderate (stage III) or severe (stage IV, V); <sup>23</sup> chronic kidney disease (i.e. presence of ICD-10 codes for chronic kidney disease); <sup>24</sup> CrCl <50mL/min; <sup>25</sup> renal disorder; <sup>26</sup> insufficient kidney function; <sup>27</sup> chronic dialysis, renal transplantation or serum creatinine >200mmol/L; <sup>28</sup> hemodialysis; <sup>29</sup> i.e. aspirin; <sup>30</sup> i.e. aspirin, cilostazol, clopidogrel, ticlopidine.

\* In case articles concern the same author, a note is added after the author to indicate what makes the articles distinct. Substudies are indented and greyed out. Studies included in the meta-analysis are underlined and presented against a white background; † median instead of mean; ° CrCl instead of eGFR.

## Supplement 6: Results of risk of bias assessment

| Author     | Year | Reference | Selection                                |                                     |                           |                                                                          | Comparability | Outcome               |                                                 |                                  | Missing data |
|------------|------|-----------|------------------------------------------|-------------------------------------|---------------------------|--------------------------------------------------------------------------|---------------|-----------------------|-------------------------------------------------|----------------------------------|--------------|
|            |      |           | Representativeness of the exposed cohort | Selection of the non exposed cohort | Ascertainment of exposure | Demonstration that outcome of interest was not present at start of study |               | Assessment of outcome | Was follow-up long enough for outcomes to occur | Adequacy of follow-up of cohorts |              |
| Arbel      | 2019 | (114)     | *                                        | *                                   | *                         |                                                                          | **            | *                     | *                                               |                                  |              |
| Atarashi   | 2021 | (115)     | *                                        | *                                   | *                         |                                                                          | **            | *                     | *                                               |                                  |              |
| Briasoulis | 2020 | (116)     | *                                        |                                     | *                         |                                                                          | **            | *                     | *                                               |                                  |              |
| Cho        | 2020 | (117)     | *                                        |                                     | *                         |                                                                          | **            | *                     | *                                               |                                  |              |
| de Groot   | 2020 | (118)     | *                                        | *                                   | *                         |                                                                          |               | *                     | *                                               |                                  |              |
| Ikeda      | 2019 | (119)     | *                                        | *                                   | *                         |                                                                          | **            | *                     | *                                               |                                  |              |
| Inoue      | 2019 | (120)     | *                                        | *                                   | *                         |                                                                          | *             | *                     | *                                               | *                                |              |
| Inoue      | 2020 | (121)     | *                                        | *                                   | *                         |                                                                          | *             | *                     | *                                               |                                  |              |
| Kobayashi  | 2020 | (122)     | *                                        | *                                   | *                         |                                                                          | **            | *                     | *                                               |                                  | *            |
| Lee        | 2017 | (123)     | *                                        | *                                   | *                         |                                                                          | **            | *                     | *                                               |                                  |              |
| Lee        | 2019 | (124)     |                                          | *                                   | *                         | *                                                                        | **            | *                     | *                                               |                                  |              |
| Lee        | 2021 | (125)     | *                                        | *                                   | *                         |                                                                          | **            | *                     | *                                               |                                  |              |
| Murata     | 2019 | (126)     | *                                        | *                                   | *                         |                                                                          | **            | *                     | *                                               | *                                |              |
| Ohno       | 2020 | (127)     | *                                        | *                                   | *                         |                                                                          | **            | *                     | *                                               |                                  | *            |
| Salameh    | 2020 | (128)     | *                                        | *                                   | *                         |                                                                          | **            | *                     | *                                               |                                  |              |
| Steinberg  | 2018 | (129)     | *                                        | *                                   | *                         |                                                                          | **            | *                     | *                                               | *                                | *            |
| Tellor     | 2017 | (130)     | *                                        |                                     | *                         |                                                                          |               | *                     | *                                               |                                  |              |
| Yagi       | 2019 | (131)     | *                                        | *                                   | *                         |                                                                          |               | *                     | *                                               |                                  |              |
| Yao        | 2017 | (132)     | *                                        | *                                   | *                         |                                                                          | **            | *                     | *                                               |                                  |              |

**Supplement 7: Results of defining the most homogeneous and best quality studies for meta-analyses**

| <b>Author*</b>                           | <b>Year</b> | <b>Reference</b> | <b>Low risk of bias in the representativeness of the exposed and non-exposed cohort (i.e. both awarded with a star according to the NOS)</b> | <b>Uses appropriate guidelines (i.e. SPC, FDA, ESC, EHRA, landmark NOAC trial(s))</b> | <b>Uses a form of propensity adjustment in the analysis of clinical outcomes associated with OLRD and reports a hazard ratio</b> | <b>Belongs to the most homogeneous and best quality studies</b> |
|------------------------------------------|-------------|------------------|----------------------------------------------------------------------------------------------------------------------------------------------|---------------------------------------------------------------------------------------|----------------------------------------------------------------------------------------------------------------------------------|-----------------------------------------------------------------|
| Arbel                                    | 2019        | (114)            | Yes                                                                                                                                          | Yes                                                                                   | No                                                                                                                               | No                                                              |
| Atarashi                                 | 2021        | (115)            | Yes                                                                                                                                          | Yes                                                                                   | No                                                                                                                               | No                                                              |
| Briasoulis<br>dabigatran/<br>rivaroxaban | 2020        | (116)            | Yes                                                                                                                                          | No                                                                                    | Yes                                                                                                                              | No                                                              |
| Briasoulis<br>dabigatran                 | 2020        | (116)            | Yes                                                                                                                                          | Yes                                                                                   | Yes                                                                                                                              | Yes                                                             |
| Briasoulis<br>rivaroxaban                | 2020        | (116)            | Yes                                                                                                                                          | No                                                                                    | Yes                                                                                                                              | No                                                              |
| Cho<br>rivaroxaban/<br>apixaban          | 2020        | (117)            | Yes                                                                                                                                          | Yes                                                                                   | No                                                                                                                               | No                                                              |
| Cho<br>rivaroxaban                       | 2020        | (117)            | Yes                                                                                                                                          | Yes                                                                                   | Yes                                                                                                                              | Yes                                                             |
| Cho<br>apixaban                          | 2020        | (117)            | Yes                                                                                                                                          | Yes                                                                                   | Yes                                                                                                                              | Yes                                                             |
| de Groot                                 | 2020        | (118)            | Yes                                                                                                                                          | Yes                                                                                   | No                                                                                                                               | No                                                              |
| Ikeda                                    | 2019        | (119)            | Yes                                                                                                                                          | Yes                                                                                   | Yes                                                                                                                              | Yes                                                             |
| Inoue                                    | 2019        | (120)            | Yes                                                                                                                                          | No                                                                                    | No                                                                                                                               | No                                                              |
| Inoue                                    | 2020        | (121)            | Yes                                                                                                                                          | Yes                                                                                   | No                                                                                                                               | No                                                              |
| Kobayashi                                | 2020        | (122)            | Yes                                                                                                                                          | No                                                                                    | Yes                                                                                                                              | No                                                              |
| Lee                                      | 2017        | (123)            | Yes                                                                                                                                          | No                                                                                    | Yes                                                                                                                              | No                                                              |
| Lee                                      | 2019        | (124)            | No                                                                                                                                           | Yes                                                                                   | Yes                                                                                                                              | No                                                              |
| Lee                                      | 2021        | (125)            | Yes                                                                                                                                          | Yes                                                                                   | Yes                                                                                                                              | Yes                                                             |
| Murata                                   | 2019        | (126)            | Yes                                                                                                                                          | No                                                                                    | Yes                                                                                                                              | No                                                              |
| Ohno                                     | 2020        | (127)            | Yes                                                                                                                                          | No                                                                                    | No                                                                                                                               | No                                                              |
| Salameh                                  | 2020        | (128)            | Yes                                                                                                                                          | Yes                                                                                   | Yes                                                                                                                              | Yes                                                             |

|                    |      |       |     |     |     |     |
|--------------------|------|-------|-----|-----|-----|-----|
| Steinberg          | 2018 | (129) | Yes | Yes | Yes | Yes |
| Tellor             | 2017 | (130) | Yes | Yes | No  | No  |
| Yagi               | 2019 | (131) | Yes | Yes | No  | No  |
| Yao<br>dabigatran  | 2017 | (132) | Yes | No  | Yes | No  |
| Yao<br>rivaroxaban | 2017 | (132) | Yes | Yes | Yes | Yes |
| Yao<br>apixaban    | 2017 | (132) | Yes | No  | Yes | No  |

EHRA = European Heart Rhythm Association; ESC= European Society of Cardiology; FDA = Food and Drugs Administration; i.e. = id est (= that is); NOS = Newcastle-Ottawa quality assessment Scale for cohort studies; NOAC = non-vitamin K antagonist oral anticoagulant; OLRD = off-label reduced dosing; SPC = Summary of Product Characteristics.

\* In case articles concern the same author and year, a note is added after the author to indicate what makes the articles distinct.

### Supplement 8: Supplemental references

1. Lafon T, Vallejo C, Hadj M, Laroche ML, Geniaux H. Misuse and adverse effects of new direct oral anticoagulants: a prospective observational study in patients admitted to an emergency unit of a French university hospital. *Therapie*. 2018;73(3):209–15.
2. Aguilar F, Lo KB, Quintero EE, Torres RJ, Hung WA, Albano JC, et al. Off-label direct oral anticoagulants dosing in atrial fibrillation and venous thromboembolism is associated with higher mortality. *Expert Review of Cardiovascular Therapy*. 2021;19(12):1119–26.
3. Alcusky M, Hume AL, Fisher M, Tjia J, Goldberg RJ, McManus DD, et al. Dabigatran versus rivaroxaban for secondary stroke prevention in patients with atrial fibrillation rehabilitated in skilled nursing facilities. *Drugs Aging*. 2018;35(12):1089–98.
4. Alghadeer S, Hornsby L. Assessment of novel oral anticoagulant use within a community teaching hospital. *Saudi Pharm J*. 2017;25(1):93–8.
5. Alnsasra H, Haim M, Senderey AB, Reges O, Leventer-Roberts M, Arnson Y, et al. Net clinical benefit of anticoagulant treatments in elderly patients with nonvalvular atrial fibrillation: experience from the real world. *Heart Rhythm*. 2019;16(1):31–7.
6. Altay S, Yildirimtürk Ö, Çakman HA, Askin L, Sinan ÜY, Besli F, et al. New oral anticoagulants-TURKEY (NOAC-TURK): multicenter cross-sectional study. *Anatol J Cardiol*. 2017;17(5):353–61.
7. Asahina C, Umetani K, Sano K, Yano T, Nakano S. Nine-year trend of oral anticoagulant use in patients with embolic stroke due to nonvalvular atrial fibrillation. *J Arrhythm*. 2020;36(5):883–9.
8. Chaudhry UA, Ezekowitz MD, Gracely EJ, George WT, Wolfe CM, Harper G, et al. Comparison of low-dose direct acting anticoagulant and warfarin in patients aged ≥80 years with atrial fibrillation. *Am J Cardiol*. 2021;152:69–77.
9. de Almeida JPHCL, Martinho AS, Girão A, Barreiro I, Milner J, Ferreira MJV, et al. Novel anticoagulants in an older and frail population with atrial fibrillation: the effect of inappropriate dosing on clinical outcomes. *Eur Geriatr Med*. 2020;11(5):813–20.
10. Eschler CM, Antelo A, Funk GC, Exadaktylos AK, Lindner G. High fluctuation between anticoagulants, frequent off-label dosing, and no difference concerning outcomes: results of a real-life cohort study. *Am J Med*. 2021;134(3):e165-70.
11. Frol S, Sernec LP, Hudnik LK, Šabovič M, Oblak JP. Effectiveness and safety of direct oral anticoagulants in the secondary stroke prevention of elderly patients: Ljubljana registry of secondary stroke prevention. *Clin Drug Investig*. 2020;40(11):1053–61.
12. George D, Devaraj NK, Rahmat SS, Mohamed S, Mohamad N. A national audit on the utilisation and documentation of dabigatran checklist for patients initiated on dabigatran. *Med J Malaysia*. 2019;74(5):425–30.

13. Gurevitz C, Giladi E, Barshesht A, Klempfner R, Goldenberg I, Kornowski R, et al. Comparison of low and full dose apixaban versus warfarin in patients with atrial fibrillation and renal dysfunction (from a national registry). *Am J Cardiol.* 2021;159:87–93.
14. Haque H, Alrowily A, Jalal Z, Tailor B, Efue V, Sarwar A, et al. Direct oral anticoagulant-related medication incidents and pharmacists' interventions in hospital in-patients: evaluation using reason's accident causation theory. *Int J Clin Pharm.* 2021;
15. Inohara T, Holmes DN, Pieper K, Blanco RG, Allen LA, Fonarow GC, et al. Decline in renal function and oral anticoagulation dose reduction among patients with atrial fibrillation. *Heart.* 2020;106(5):358–64.
16. Jackevicius CA, Lu L, Ghaznavi Z, Warner AL. Bleeding risk of direct oral anticoagulants in patients with heart failure and atrial fibrillation. *Circ Cardiovasc Qual Outcomes.* 2021;14(2):e007230.
17. Khan F, Huang H, Datta YH. Direct oral anticoagulant use and the incidence of bleeding in the very elderly with atrial fibrillation. *J Thromb Thrombolysis.* 2016;42(4):573–8.
18. Kim HM, Choi EK, Park CS, Cha MJ, Lee SY, Kwon JM, et al. Effectiveness and safety of non-vitamin K antagonist oral anticoagulants in octogenarian patients with non-valvular atrial fibrillation. *PLoS One.* 2019;14(3):e0211766.
19. Kwon CH, Kim M, Kim J, Nam GB, Choi KJ, Kim YH. Real-world comparison of non-vitamin K antagonist oral anticoagulants and warfarin in Asian octogenarian patients with atrial fibrillation. *J Geriatr Cardiol.* 2016;13(7):566–72.
20. Lafon T, Vallejo C, Hadj M, Laroche ML, Geniaux H. Misuse and adverse effects of new direct oral anticoagulants: a prospective observational study in patients admitted to an emergency unit of a French university hospital. *Therapie.* 2017;73(3):209–15.
21. Mitrovic D, Drost-Wijnne J, Jochemsen G, Meijerink H. Richtlijnadherentie bij het voorschrijven van direct werkende orale anticoagulantia. *Nederlands Platform voor Farmaceutisch Onderzoek.* 2017;2:a1640.
22. Nahornyj E, Goutelle S, Bourguignon L, Gastine B de la. Evaluation of direct oral anticoagulants (DOACs) prescriptions in geriatric hospital over 3 years. *Therapies.* 2021;76(3):191–200.
23. Paciaroni M, Agnelli G, Caso V, Silvestrelli G, Seiffge DJ, Engelter S, et al. Causes and risk factors of cerebral ischemic events in patients with atrial fibrillation treated with non-vitamin K antagonist oral anticoagulants for stroke prevention: the RENo study. *Stroke.* 2019;50(8):2168–74.
24. Rutherford OCW, Jonasson C, Ghanima W, Söderdahl F, Halvorsen S. Effectiveness and safety of oral anticoagulants in elderly patients with atrial fibrillation. *Heart.* 2021;0:1–8.

25. Shinoda N, Mori M, Tamura S, Korosue K, Kose S, Kohmura E. Risk of recurrent ischemic stroke with unintended low-dose oral anticoagulant therapy and optimal timing of review. *J Stroke Cerebrovasc Dis*. 2018;27(6):1546–51.
26. Shinohara M, Fujino T, Yao S, Yano K, Akitsu K, Koike H, et al. Assessment of the bleeding risk of anticoagulant treatment in non-severe frail octogenarians with atrial fibrillation. *J Cardiol*. 2019;73(1):7–13.
27. Shinohara M, Wada R, Yao S, Yano K, Akitsu K, Koike H, et al. Evaluation of oral anticoagulants in atrial fibrillation patients over 80 years of age with nonsevere frailty. *J Arrhythm*. 2019;35(6):795–803.
28. Szeto CLC, Hui KF. Residual stroke risk in patients with atrial fibrillation treated with non-vitamin K oral anticoagulants: an 8-year retrospective cohort study. *Cerebrovasc Dis Extra*. 2021;11(1):9–14.
29. Ting C, Rhoten M, Dempsey J, Nichols H, Fanikos J, Ruff CT. Evaluation of direct oral anticoagulant prescribing in patients with moderate to severe renal impairment. *Clin Appl Thromb Hemost*. 2021;27:1–8.
30. Tran E, Duckett A, Fisher S, Bohm N. Appropriateness of direct oral anticoagulant dosing for venous thromboembolism treatment. *J Thromb Thrombolysis*. 2017;43(4):505–13.
31. Whitworth MM, Haase KK, Fike DS, Bharadwaj RM, Young RB, MacLaughlin EJ. Utilization and prescribing patterns of direct oral anticoagulants. *Int J Gen Med*. 2017;10:87–94.
32. Akagi Y, Chiba T, Uekusa S, Kato H, Yamamura S, Aoki Y, et al. Retrospective cohort study of the efficacy and safety of dabigatran: real-life dabigatran use including very low-dose 75 mg twice daily administration. *J Pharm Health Care Sci*. 2019;5:17.
33. Akao M, Chun YH, Esato M, Abe M, Tsuji H, Wada H, et al. Inappropriate use of oral anticoagulants for patients with atrial fibrillation. *Circ J*. 2014;78(9):2166–72.
34. Amarenco P, Haas S, Hess S, Kirchhof P, Lambelet M, Bach M, et al. Outcomes associated with non-recommended dosing of rivaroxaban: results from the XANTUS study. *Eur Heart J Cardiovasc Pharmacother*. 2019;5(2):70–9.
35. Anouassi Z, Atallah B, Alsoud LO, El Nekidy W, Al Mahmeed W, AlJaabari M, et al. Appropriateness of the direct oral anticoagulants dosing in the Middle East Gulf region. *J Cardiovasc Pharmacol*. 2021;77(2):182–8.
36. Armbruster AL, Buehler KS, Min SH, Riley M, Daly MW. Evaluation of dabigatran for appropriateness of use and bleeding events in a community hospital setting. *Am Health Drug Benefits*. 2014;7(7):376–84.
37. Ashraf H, Agasthi P, Shanbhag A, Mehta RA, Rattanawong P, Allam M, et al. Long-term clinical outcomes of underdosed direct oral anticoagulants in patients with atrial fibrillation and atrial flutter. *Am J Med*. 2021;134(6):788–96.

38. Blin P, Dureau-Pournin C, Cottin Y, Bénichou J, Mismetti P, Abouelfath A, et al. Comparative effectiveness and safety of standard or reduced dose dabigatran vs. rivaroxaban in nonvalvular atrial fibrillation. *Clin Pharmacol Ther.* 2019;105(6):1439–55.
39. Bouget J, Balusson F, Maignan M, Pavageau L, Roy PM, Lacut K, et al. Major bleeding risk associated with oral anticoagulant in real clinical practice. A multicentre 3-year period population-based prospective cohort study. *Br J Clin Pharmacol.* 2020;86(12):2519–29.
40. Camm AJ, Cools F, Virdone S, Bassand JP, Fitzmaurice DA, Arthur Fox KA, et al. Mortality in patients with atrial fibrillation receiving nonrecommended doses of direct oral anticoagulants. *J Am Coll Cardiol.* 2020;76(12):1425–36.
41. Chan YH, Chao TF, Chen SW, Lee HF, Yeh YH, Huang YC, et al. Off-label dosing of non-vitamin K antagonist oral anticoagulants and clinical outcomes in Asian patients with atrial fibrillation. *Heart Rhythm.* 2020;17(12):2102–10.
42. Chen IC, Chang WT, Hsu PC, Yeh YL, Zheng S, Huang YC, et al. Off-label reduced-dose apixaban does not reduce hemorrhagic risk in Taiwanese patients with nonvalvular atrial fibrillation: a retrospective, observational study. *Medicine (Baltimore).* 2021;100(23):e26272.
43. Cheng WH, Chao TF, Lin YJ, Chang SL, Lo LW, Hu YF, et al. Low-dose rivaroxaban and risks of adverse events in patients with atrial fibrillation. *Stroke.* 2019;50(9):2574–7.
44. Cho MS, Yun JE, Park JJ, Kim YJ, Lee J, Kim H, et al. Outcomes after use of standard- and low-dose non-vitamin K oral anticoagulants in Asian patients with atrial fibrillation. *Stroke.* 2019;50:110–8.
45. De Caterina R, Kim YH, Koretsune Y, Wang CC, Yamashita T, Chen C, et al. Safety and effectiveness of edoxaban in atrial fibrillation patients in routine clinical practice: one-year follow-up from the global noninterventional ETNA-AF program. *J Clin Med.* 2021;10(4):573.
46. Ebrahimi R, Han JK, Goe SH, Treadwell M, Feliciano Z. Patient characteristics and clinical outcomes with low-dose dabigatran. *Front Cardiovasc Med.* 2017;4:42.
47. Feng Y, Pai CW, Seiler K, Barnes GD. Adverse outcomes associated with inappropriate direct oral anticoagulant starter pack prescription among patients with atrial fibrillation: a retrospective claims-based study. *J Thromb Thrombolysis.* 2021;51(4):1144–9.
48. Fernández MS, Marín F, Rafols C, Arribas F, Barrios V, Cosín-Sales J, et al. Thromboembolic and bleeding events with rivaroxaban in clinical practice in Spain: impact of inappropriate doses (the EMIR study). *J Comp Eff Res.* 2021;10(7):583–93.
49. Forslund T, Wettermark B, Andersen M, Hjemdahl P. Stroke and bleeding with non-vitamin K antagonist oral anticoagulant or warfarin treatment in patients with non-

- valvular atrial fibrillation: a population-based cohort study. *Europace*. 2018;20(3):420–8.
50. Gabitova MA, Krupenin PM, Sokolova AA, Napalkov DA, Fomin V V. Safety of non-vitamin K oral anticoagulants in elderly patients with atrial fibrillation. *Rational Pharmacotherapy in Cardiology*. 2019;15(6):802–5.
  51. Godino C, Bodega F, Melillo F, Rubino F, Parlati AL, Cappelletti A, et al. Inappropriate dose of nonvitamin-K antagonist oral anticoagulants: prevalence and impact on clinical outcome in patients with nonvalvular atrial fibrillation. *J Cardiovasc Med (Hagerstown)*. 2020;21(10):751–8.
  52. Hecker J, Marten S, Keller L, Helmert S, Michalski F, Werth S, et al. Effectiveness and safety of rivaroxaban therapy in daily-care patients with atrial fibrillation: results from the Dresden NOAC registry. *Thromb Haemost*. 2016;115(5):939–49.
  53. Helmert S, Marten S, Mizera H, Reitter A, Sahin K, Tittl L, et al. Effectiveness and safety of apixaban therapy in daily-care patients with atrial fibrillation: results from the Dresden NOAC registry. *J Thromb Thrombolysis*. 2017;44(2):169–78.
  54. Hussain S, Gebran N, Hussain K, Soliman K. Drug use evaluation of dabigatran in a tertiary care hospital in United Arab Emirates. *Eur J Hosp Pharm*. 2012;0:1–4.
  55. Inoue H, Umeyama M, Yamada T, Hashimoto H, Komoto A, Yasaka M. Safety and effectiveness of apixaban in Japanese patients with nonvalvular atrial fibrillation in clinical practice: a regulatory postmarketing surveillance, the STANDARD study. *J Arrhythm*. 2019;35(3):506–14.
  56. Isaacs AN, Doolin M, Morse C, Shiltz E, Nisly SA. Medication utilization evaluation of dabigatran and rivaroxaban within a large, multi-center health system. *Journal of Health-System Pharmacy Residents*. 2013;2(3).
  57. Isaacs AN, Doolin M, Morse C, Shiltz E, Nisly SA. Medication utilization evaluation of dabigatran and rivaroxaban within a large, multi-center health system. *Am J Health Syst Pharm*. 2016;73(suppl 1):S35–41.
  58. Jang BM, Lee OS, Shin EJ, Cho EJ, Suh SY, Cho YS, et al. Factors related to inappropriate edoxaban use. *J Clin Pharm Ther*. 2019;44(5):760–7.
  59. Jansson M, Sjölander S, Sjögren V, Renlund H, Norrving B, Sjölander A. Direct comparisons of effectiveness and safety of treatment with apixaban, dabigatran and rivaroxaban in atrial fibrillation. *Thromb Res*. 2020;185:135–41.
  60. Kohsaka S, Katada J, Saito K, Jenkins A, Li B, Mardekian J, et al. Safety and effectiveness of non-vitamin K oral anticoagulants versus warfarin in real-world patients with non-valvular atrial fibrillation: a retrospective analysis of contemporary Japanese administrative claims data. *Open Heart*. 2020;7(1):e001232.
  61. Kotalczyk A, Guo Y, Wang Y, Lip GYH. Are low doses of non-vitamin K antagonists effective in Chinese patients with atrial fibrillation? A report from the Optimal

- Thromboprophylaxis in Elderly Chinese Patients with Atrial Fibrillation (ChiOTEAF) registry. *International Journal of Stroke*. 2021;
62. Larsen TB, Rasmussen LH, Skjøth F, Due KM, Callréus T, Rosenzweig M, et al. Efficacy and safety of dabigatran etexilate and warfarin in “real-world” patients with atrial fibrillation: a prospective nationwide cohort study. *J Am Coll Cardiol*. 2013;61(22):2264–73.
  63. Lee S, Sayers M, Lip G, Lane D. Use of non-vitamin K antagonist oral anticoagulants in atrial fibrillation patients: insights from a specialist atrial fibrillation clinic. *Int J Clin Pract*. 2015;69(11):1341–8.
  64. Li XS, Deitelzweig S, Keshishian A, Hamilton M, Horblyuk R, Gupta K, et al. Effectiveness and safety of apixaban versus warfarin in non-valvular atrial fibrillation patients in “real-world” clinical practice: a propensity-matched analysis of 76,940 patients. *Thromb Haemost*. 2017;117(6):1072–82.
  65. Marzona I, Proietti M, Colacioppo P, Foresta A, Baviera M. Effectiveness and safety of high and low dose NOACs in patients with atrial fibrillation. *Eur J Intern Med*. 2021;88:118–22.
  66. Lobato SM, Tarrazo CT, Fernández EG, Alcalá MM. Clinical profile, adequacy of dosage and thromboembolic and bleeding outcomes in patients with nonvalvular atrial fibrillation treated with rivaroxaban in a regional hospital of Asturias, Spain. *Future Cardiol*. 2018;14(3s):17–24.
  67. Navarro-Almenzar B, Cerezo-Manchado JJ, Caro-Martinez C, García-Candel F, Flores Blanco PJ, Ruiz GE, et al. Real-life behaviour of direct oral anticoagulants in a Spanish cohort with non-valvular atrial fibrillation: refase registry. *Curr Med Res Opin*. 2019;35(12):2035–41.
  68. Nielsen PB, Skjøth F, Søgaard M, Kjældgaard JN, Lip GY, Larsen TB. Effectiveness and safety of reduced dose non-vitamin K antagonist oral anticoagulants and warfarin in patients with atrial fibrillation: propensity weighted nationwide cohort study. *BMJ*. 2017;356:j510.
  69. Ogawa S, Ikeda T, Kitazono T, Nakagawara J, Minematsu K, Miyamoto S, et al. Present profiles of novel anticoagulant use in Japanese patients with atrial fibrillation: insights from the rivaroxaban postmarketing surveillance registry. *J Stroke Cerebrovasc Dis*. 2014;23(10):2520–6.
  70. Perreault S, Dragomir A, Côté R, Lenglet A, White-Guay B, de Denus S, et al. Comparative effectiveness and safety of high-dose rivaroxaban and apixaban for atrial fibrillation: a propensity score-matched cohort study. *Pharmacotherapy*. 2021;41(4):379–93.
  71. Qian Y, Zhang J, Li J, Weng Z. A retrospective study on the evaluation of the appropriateness of oral anticoagulant therapy for patients with atrial fibrillation. *PLoS ONE*. 2021;16(11):e0259199.

72. Raccach BH, Erlichman Y, Pollak A, Matok I, Muszkat M. Prescribing errors with direct oral anticoagulants and their impact on the risk of bleeding in patients with atrial fibrillation. *J Cardiovasc Pharmacol Ther.* 2021;10742484211019656.
73. Rahme E, Godin R, Nedjar H, Dasgupta K, Tagalakis V. Dose specific effectiveness and safety of DOACs in patients with non-valvular atrial fibrillation: a Canadian retrospective cohort study. *Thromb Res.* 2021;203:121–30.
74. Ruiz-Ortiz M, Esteve-Pastor MA, Roldán I, Muniz J, Marín F, Anguita M. Prognostic impact of inappropriate doses of direct oral anticoagulants in clinical practice. *Rev Esp Cardiol (Engl Ed).* 2020;73(4):329–30.
75. Russo V, Bianchi V, Cavallaro C, Vecchione F, De Vivo S, Santangelo L, et al. Efficacy and safety of dabigatran in a “real-life” population at high thromboembolic and hemorrhagic risk: data from MonaldiCare registry. *Eur Rev Med Pharmacol Sci.* 2015;19(20):3961–7.
76. Sato T, Aizawa Y, Fuse K, Fujita S, Ikeda Y, Kitazawa H, et al. The comparison of inappropriate-low-doses use among 4 direct oral anticoagulants in patients with atrial fibrillation: from the database of a single-center registry. *J Stroke Cerebrovasc Dis.* 2018;27(11):3280–8.
77. Shrestha S, Baser O, Kwong WJ. Effect of renal function on dosing of non-vitamin K antagonist direct oral anticoagulants among patients with nonvalvular atrial fibrillation. *Ann Pharmacother.* 2018;52(2):147–53.
78. Staerk L, Gerds T, Lip G, Ozenne B, Bonde A, Lamberts M, et al. Standard and reduced doses of dabigatran, rivaroxaban and apixaban for stroke prevention in atrial fibrillation: a nationwide cohort study. *J Intern Med.* 2018;283(1):45–55.
79. Sugrue A, Sanborn D, Amin M, Farwati M, Sridhar H, Ahmed A, et al. Inappropriate dosing of direct oral anticoagulants in patients with atrial fibrillation. *Am J Cardiol.* 2021;144:52–9.
80. Wattanaruengchai P, Nathisuwan S, Rattanavipanon W, Chulavatnatol S, Kongwatcharapong J, Mitsuntisuk P, et al. Prescriber compliance to direct oral anticoagulant labels and impact on outcomes in Thailand. *Br J Clin Pharmacol.* 2021;87(3):1390–400.
81. Yu HT, Yang PS, Jang E, Kim TH, Uhm JS, Kim JY, et al. Label adherence of direct oral anticoagulants dosing and clinical outcomes in patients with atrial fibrillation. *J Am Heart Assoc.* 2020;9(12):e014177.
82. Bando S, Nishikado A, Hiura N, Ikeda S, Kakutani A, Yamamoto K, et al. Efficacy and safety of rivaroxaban in extreme elderly patients with atrial fibrillation: analysis of the Shikoku rivaroxaban registry trial (SRRT). *J Cardiol.* 2018;71(2):197–201.
83. Bang OY, On YK, Lee MY, Jang SW, Han S, Han S, et al. The risk of stroke/systemic embolism and major bleeding in Asian patients with nonvalvular atrial fibrillation

- treated with non-vitamin K oral anticoagulants compared to warfarin: results from a real-world data analysis. *PLoS One*. 2020;15(11):e0242922.
84. Barra ME, Fanikos J, Connors JM, Sylvester KW, Piazza G, Goldhaber SZ. Evaluation of dose-reduced direct oral anticoagulant therapy. *Am J Med*. 2016;129(11):1198–204.
  85. Bastida C, Corominas N, Sotoca JM, Rovira M. Anticoagulation in atrial fibrillation: NOAC prescribing in primary health care. *Int J Clin Pharm*. 2017;39(2):478–82.
  86. Brook R, Aswapanyawongse O, Tacey M, Kitipornchai T, Ho P, Lim HY. Real-world direct oral anticoagulant experience in atrial fibrillation: falls risk and low dose anticoagulation are predictive of both bleeding and stroke risk. *Intern Med J*. 2020;50(11):1359–66.
  87. Chao TF, Hong KS, Lee BC, De Caterina R, Kirchhof P, Reimitz PE, et al. Factors associated with the dosing of edoxaban for stroke prevention in patients with atrial fibrillation from South Korea and Taiwan: 1-year data from the Global ETNA-AF Program. *J Chin Med Assoc*. 2021;84(5):485–90.
  88. Eschler CM, Woitok BK, Funk GC, Walter P, Maier V, Exadaktylos AK, et al. Oral anticoagulation in patients in the emergency department: high rates of off-label doses, no difference in bleeding rates. *Am J Med*. 2020;133(5):599–604.
  89. Gustafson WL, Saunders J, Vazquez SR, Jones AE, Witt DM. Real-world study of direct oral anticoagulant dosing patterns in patients with atrial fibrillation. *Pharm Pract (Granada)*. 2019;17(4):1709.
  90. Ionin VA, Bliznuk O, Baranova E, Shlyakhto E. Anticoagulant therapy in patients with non-valvular atrial fibrillation in real clinical practice: in appropriate dose reductions. *Rational Pharmacotherapy in Cardiology*. 2021;17(2):206–11.
  91. Kartas A, Samaras A, Vasdeki D, Dividis G, Fotos G, Paschou E, et al. Flaws in anticoagulation strategies in patients with atrial fibrillation at hospital discharge. *J Cardiovasc Pharmacol Ther*. 2019;24(3):225–32.
  92. Kilickiran Avci B, Vatan B, Ozden Tok O, Aidarova T, Sahinkus S, Uygun T, et al. The trends in utilizing nonvitamin K antagonist oral anticoagulants in patients with nonvalvular atrial fibrillation: a real-life experience. *Clin Appl Thromb Hemost*. 2016;22(8):785–91.
  93. Kimmons LA, Kabra R, Davis M, Segars B V, Oliphant CS. Dabigatran use in the real world: a multihospital system experience. *J Pharm Pract*. 2014;27(4):384–8.
  94. Larock AS, Mullier F, Sennesael AL, Douxfils J, Devalet B, Chatelain C, et al. Appropriateness of prescribing dabigatran etexilate and rivaroxaban in patients with nonvalvular atrial fibrillation: a prospective study. *Ann Pharmacother*. 2014;48(10):1258–68.

95. Lee KN, Choi JI, Boo KY, Kim DY, Kim YG, Oh SK, et al. Effectiveness and safety of off-label dosing of non-vitamin K antagonist anticoagulant for atrial fibrillation in Asian patients. *Sci Rep.* 2020;10(1):1801.
96. Lodziński P, Gawałko M, Budnik M, Tymińska A, Ozierański K, Grabowski M, et al. Trends in antithrombotic management of patients with atrial fibrillation. *Pol Arch Intern Med.* 2020;130(3):196–205.
97. Masunaga N, Abe M, Ogawa H, Aono Y, Ikeda S, Doi K, et al. Current status, time trends and outcomes of combination therapy with oral anticoagulant and antiplatelet drug in patients with atrial fibrillation: the Fushimi AF registry. *Circ J.* 2018;82(12):2983–91.
98. Miyazaki S, Miyauchi K, Hayashi H, Yamashiro K, Tanaka R, Nishizaki Y, et al. Trends of anticoagulant use and outcomes of patients with non-valvular atrial fibrillation: Findings from the RAFFINE registry. *Journal of Cardiology.* 2022;80:41–8.
99. Pisters R, van Vugt S, Brouwer M, Elvan A, ten Holt W, Zwart P, et al. Real-life use of rivaroxaban in the Netherlands: data from the Xarelto for prevention of stroke in patients with atrial fibrillation (XANTUS) registry. *Neth Heart J.* 2017;25(10):551–8.
100. Sato T, Aizawa Y, Fuse K, Fujita S, Ikeda Y, Kitazawa H, et al. The impact of cancer on major bleeding and stroke/systemic emboli in patients using direct oral anticoagulants: from the database of a single-center registry. *J Atr Fibrillation.* 2018;11(4):2105.
101. Sato T, Aizawa Y, Kitazawa H, Okabe M. The characteristics and clinical outcomes of direct oral anticoagulants in patients with atrial fibrillation and chronic kidney disease: from the database of a single-center registry. *J Atr Fibrillation.* 2020;13(2):1–8.
102. Suwa M, Morii I, Kino M. Rivaroxaban or apixaban for non-valvular atrial fibrillation: efficacy and safety of off-label under-dosing according to plasma concentration. *Circ J.* 2019;83(5):991–9.
103. Tedders KM, Lucey MF, Edwin SB. Evaluation of pharmacist-managed dabigatran in an inpatient setting. *Ann Pharmacother.* 2013;47(12):1649–53.
104. Tellor K, Patel S, Armbruster A, Daly M. Evaluation of the appropriateness of dosing, indication and safety of rivaroxaban in a community hospital. *J Clin Pharm Ther.* 2015;40(4):447–51.
105. Tran TH, Nguyen C, Lam T, Campbell P. Bleeding incidence and real-life prescribing practices with dabigatran use in an acute care setting. *Consult Pharm.* 2014;29(11):735–40.
106. Umei M, Kishi M, Sato T, Shindo A, Toyoda M, Yokoyama M, et al. Indications for suboptimal low-dose direct oral anticoagulants for non-valvular atrial fibrillation patients. *J Arrhythm.* 2017;33(5):475–82.
107. Vinding NE, Staerk L, Gislason GH, Torp-Pedersen C, Bonde AN, Rørth R, et al. Switching from vitamin K antagonist to dabigatran in atrial fibrillation: differences according to dose. *Eur Heart J Cardiovasc Pharmacother.* 2021;7(1):20–30.

108. Xing LY, Barcella CA, Sindet-Pedersen C, Bonde AN, Gislason GH, Olesen JB. Dose reduction of non-vitamin K antagonist oral anticoagulants in patients with atrial fibrillation: a Danish nationwide cohort study. *Thromb Res.* 2019;178:101–9.
109. Yiginer O, Tezcan M, Erdal E, Degirmencioglu G, Acar G, Ergelen M, et al. A real-world, retrospective, observational study of dabigatran and rivaroxaban in Turkey: elderly patients receive inappropriately low dose of rivaroxaban. *Int J Clin Exp Med.* 2017;10(7):10634–42.
110. Zeymer U, Lober C, Wolf A, Richard F, Schäfer H, Taggeselle J, et al. Use, persistence, efficacy, and safety of apixaban in patients with non-valvular atrial fibrillation in unselected patients in Germany: results of the prospective apixaban in atrial fibrillation (APAF) registry. *Cardiol Ther.* 2020;9(2):467–78.
111. Abe I, Takahashi N. Wait a minute to prescribe off-label reduced dose of apixaban. *European Heart Journal - Cardiovascular Pharmacotherapy.* 2021;7:424–5.
112. Steinberg BA, Shrader P, Thomas L, Ansell J, Fonarow GC, Gersh BJ, et al. Off-label dosing of non-vitamin K antagonist oral anticoagulants and adverse outcomes: the ORBIT-AF II registry. *J Am Coll Cardiol.* 2016;68(24):2597–604.
113. Ueda A, Toki S, Kitayama C, Akazawa M. Reduction in the doses of direct oral anticoagulants and risk of ischemic stroke events: a hospital survey. *Biol Pharm Bull.* 2020;43(7):1135–40.
114. Arbel R, Sergienko R, Hammerman A, Greenberg-Dotan S, Batat E, Avnery O, et al. Effectiveness and safety of off-label dose-reduced direct oral anticoagulants in atrial fibrillation. *Am J Med.* 2019;132(7):847-55.e3.
115. Atarashi H, Uchiyama S, Inoue H, Kitazono T, Yamashita T, Shimizu W, et al. Ischemic stroke, hemorrhage, and mortality in patients with non-valvular atrial fibrillation and renal dysfunction treated with rivaroxaban: sub-analysis of the EXPAND study. *Heart Vessels.* 2021;36(9):1410–20.
116. Briasoulis A, Gao Y, Inampudi C, Alvarez P, Asleh R, Chrischilles E, et al. Characteristics and outcomes in patients with atrial fibrillation receiving direct oral anticoagulants in off-label doses. *BMC Cardiovasc Disord.* 2020;20(1):42.
117. Cho MS, Yun JE, Park JJ, Kim YJ, Lee J, Kim H, et al. Pattern and impact of off-label underdosing of non-vitamin K antagonist oral anticoagulants in patients with atrial fibrillation who are indicated for standard dosing. *Am J Cardiol.* 2020;125(9):1332–8.
118. de Groot JR, Weiss TW, Kelly P, Monteiro P, Deharo JC, de Asmundis C, et al. Edoxaban for stroke prevention in atrial fibrillation in routine clinical care: 1-year follow-up of the prospective observational ETNA-AF-Europe study. *Eur Heart J Cardiovasc Pharmacother.* 2021;7(F1):f30-9.
119. Ikeda T, Ogawa S, Kitazono T, Nakagawara J, Minematsu K, Miyamoto S, et al. Outcomes associated with under-dosing of rivaroxaban for management of non-

- valvular atrial fibrillation in real-world Japanese clinical settings. *J Thromb Thrombolysis*. 2019;48(4):653–60.
120. Inoue H, Uchiyama S, Atarashi H, Okumura K, Koretsune Y, Yasaka M, et al. Effectiveness and safety of long-term dabigatran among patients with non-valvular atrial fibrillation in clinical practice: J-dabigatran surveillance. *J Cardiol*. 2019;73(6):507–14.
  121. Inoue H, Umeyama M, Yamada T, Hashimoto H, Komoto A, Yasaka M. Safety and effectiveness of reduced-dose apixaban in Japanese patients with nonvalvular atrial fibrillation in clinical practice: a sub-analysis of the STANDARD study. *J Cardiol*. 2020;75(2):208–15.
  122. Kobayashi T, Sotomi Y, Hirata A, Sakata Y, Hirayama A, Higuchi Y. Impact of direct oral anticoagulant off-label reduced dose in combination with antiplatelet agents on clinical outcome: propensity score-matching analysis from the DIRECT real-world non-valvular atrial fibrillation registry. *Circ Rep*. 2020;2(6):289–96.
  123. Lee KH, Park HW, Lee N, Hyun DY, Won J, Oh SS, et al. Optimal dose of dabigatran for the prevention of thromboembolism with minimal bleeding risk in Korean patients with atrial fibrillation. *Europace*. 2017;19(suppl\_4):iv1-9.
  124. Lee SR, Choi EK, Han KD, Jung JH, Oh S, Lip GY. Optimal rivaroxaban dose in Asian patients with atrial fibrillation and normal or mildly impaired renal function. *Stroke*. 2019;50(5):1140–8.
  125. Lee SR, Choi EK, Park SH, Jung JH, Han KD, Oh S, et al. Off-label underdosed apixaban use in Asian patients with non-valvular atrial fibrillation. *Eur Heart J Cardiovasc Pharmacother*. 2021;7(5):415–23.
  126. Murata N, Okumura Y, Yokoyama K, Matsumoto N, Tachibana E, Kuronuma K, et al. Clinical outcomes of off-label dosing of direct oral anticoagulant therapy among Japanese patients with atrial fibrillation identified from the SAKURA AF registry. *Circ J*. 2019;83(4):727–35.
  127. Ohno J, Sotomi Y, Hirata A, Sakata Y, Hirayama A, Higuchi Y. Dose of direct oral anticoagulants and adverse outcomes in Asia. *Am J Cardiol*. 2021;139:50–6.
  128. Salameh M, Gronich N, Stein N, Kotler A, Rennert G, Auriel E, et al. Stroke and bleeding risks in patients with atrial fibrillation treated with reduced apixaban dose: a real-life study. *Clin Pharmacol Ther*. 2020;108(6):1265–73.
  129. Steinberg BA, Shrader P, Pieper K, Thomas L, Allen LA, Ansell J, et al. Frequency and outcomes of reduced dose non-vitamin K antagonist anticoagulants: results from ORBIT-AF II (the outcomes registry for better informed treatment of atrial fibrillation II). *J Am Heart Assoc*. 2018;7(4):e007633.
  130. Tellor KB, Wang M, Green MS, Armbruster AL. Evaluation of apixaban for the treatment of nonvalvular atrial fibrillation with regard to dosing and safety in a community hospital. *J Pharm Technol*. 2017;33(4):140–5.

131. Yagi N, Suzuki S, Arita T, Otsuka T, Semba H, Kano H, et al. Creatinine clearance and inappropriate dose of rivaroxaban in Japanese patients with non-valvular atrial fibrillation. *Heart Vessels*. 2020;35(1):110–7.
132. Yao X, Shah ND, Sangaralingham LR, Gersh BJ, Noseworthy PA. Non-vitamin K antagonist oral anticoagulant dosing in patients with atrial fibrillation and renal dysfunction. *J Am Coll Cardiol*. 2017;69(23):2779–90.
